# Supplementary material for: Conformational Changes of Glutamine 5′-Phosphoribosylpyrophosphate Amidotransferase for Two Substrates Analogue Binding: Insight from Conventional Molecular Dynamics and Accelerated Molecular Dynamics Simulations
Source: PubMed Central journal article supplement (PMC7953260; doi:10.3389/fchem.2021.640994), 2021-02-26
Supplement: DataSheet1.pdf [file DataSheet1.pdf]

*Supplementary Material*

Supplementary Figures and Tables

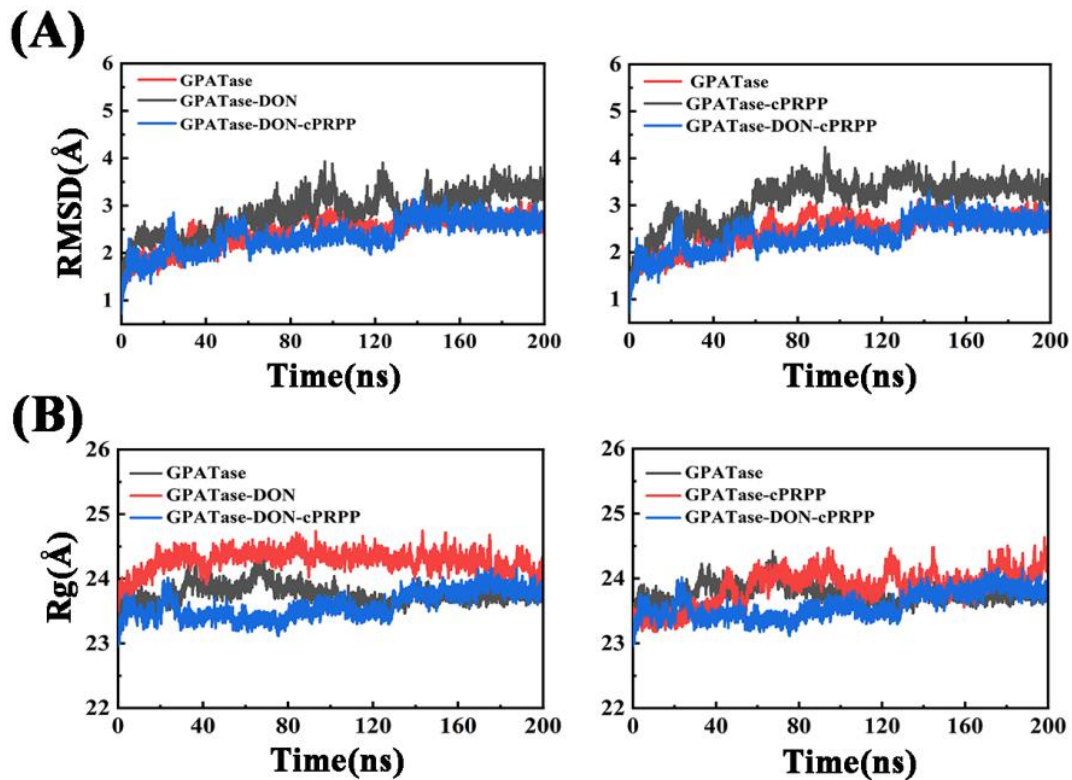

**Figure S1.** Stability analysis during 200ns cMD simulations for four systems. (A) The RMSD plot and (B) Radius of gyration(Rg) plot.

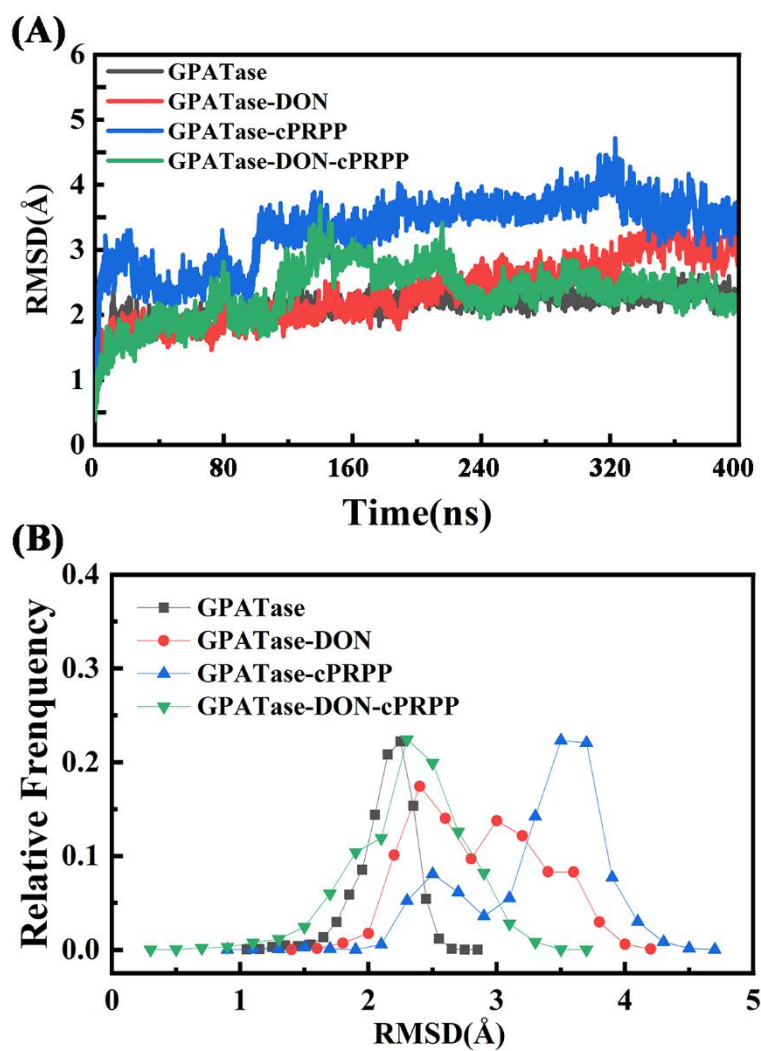

**Figure S2.** Stability analysis during 400ns aMD simulations for four systems. (A) The RMSD plot of  $C\alpha$  atoms. (B) The corresponding relative frequency RMSD values.

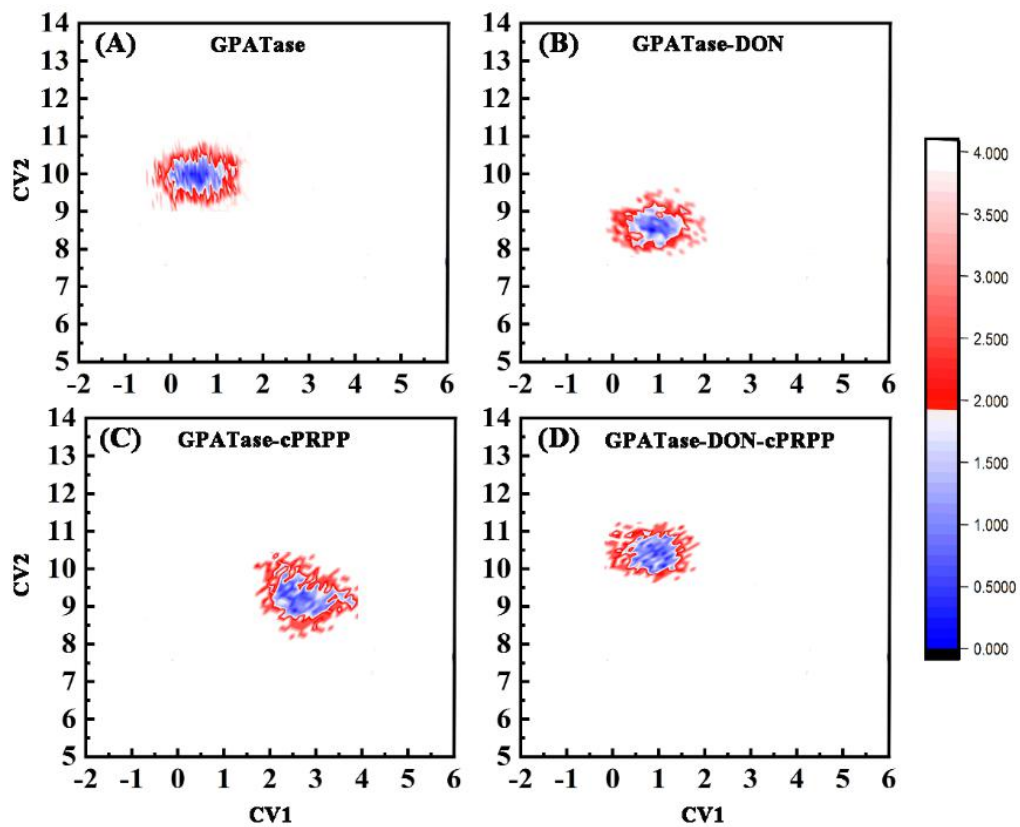

**Figure S3.** The free energy profile maps of flexible loops for **(A)** GPATase; **(B)** GPATase-DON; **(C)** GPATase-cPRPP; **(D)** GPATase-DON-cPRPP as a function of CV1 and CV2 in Å during cMD simulations.

**Table S1.** Clustering results for the top six clusters from GPATase model MD simulations trajectories with K-means clustering algorithm.

| #Cluster | Frames | %    | AvgDist <sup>a</sup> | Stdev <sup>b</sup> | Centroid <sup>c</sup> | AvgCDist <sup>d</sup> |
|----------|--------|------|----------------------|--------------------|-----------------------|-----------------------|
| <b>0</b> | 6458   | 32.3 | 1.32                 | 0.16               | 17321                 | 2.12                  |
| <b>1</b> | 3455   | 17.3 | 1.46                 | 0.22               | 10827                 | 1.95                  |
| <b>2</b> | 2029   | 10.5 | 1.29                 | 0.14               | 12286                 | 1.95                  |
| <b>3</b> | 1817   | 9.1  | 1.44                 | 0.22               | 5837                  | 1.69                  |
| <b>4</b> | 1715   | 8.6  | 1.31                 | 0.21               | 586                   | 2.02                  |
| <b>5</b> | 1277   | 6.4  | 1.30                 | 0.20               | 2239                  | 1.81                  |

**Table S2.** Clustering results for the top six clusters from GPATase-DON model MD simulations trajectories with K-means clustering algorithm.

| #Cluster | Frames | %    | AvgDist <sup>a</sup> | Stdev <sup>b</sup> | Centroid <sup>c</sup> | AvgCDist <sup>d</sup> |
|----------|--------|------|----------------------|--------------------|-----------------------|-----------------------|
| <b>0</b> | 3046   | 15.2 | 1.40                 | 0.17               | 13644                 | 1.32                  |
| <b>1</b> | 2983   | 14.9 | 1.45                 | 0.21               | 15864                 | 1.41                  |
| <b>2</b> | 2661   | 13.3 | 1.34                 | 0.18               | 7767                  | 1.53                  |
| <b>3</b> | 2203   | 11.0 | 1.35                 | 0.19               | 3133                  | 1.78                  |
| <b>4</b> | 2092   | 10.5 | 1.25                 | 0.16               | 1500                  | 2.14                  |
| <b>5</b> | 1856   | 9.3  | 1.53                 | 0.23               | 17478                 | 1.58                  |

**Table S3.** Clustering results for the top six clusters from GPATase-cPRPP model MD simulations trajectories with K-means clustering algorithm.

| #Cluster | Frames | %    | AvgDist <sup>a</sup> | Stdev <sup>b</sup> | Centroid <sup>c</sup> | AvgCDist <sup>d</sup> |
|----------|--------|------|----------------------|--------------------|-----------------------|-----------------------|
| <b>0</b> | 4234   | 21.2 | 1.51                 | 0.21               | 8412                  | 2.06                  |
| <b>1</b> | 3634   | 18.2 | 1.40                 | 0.20               | 12680                 | 2.00                  |
| <b>2</b> | 2284   | 11.4 | 1.44                 | 0.24               | 2355                  | 2.16                  |
| <b>3</b> | 2194   | 11.0 | 1.51                 | 0.24               | 18376                 | 2.19                  |
| <b>4</b> | 1731   | 8.7  | 1.60                 | 0.25               | 15455                 | 1.79                  |
| <b>5</b> | 1428   | 7.1  | 1.56                 | 0.27               | 4250                  | 1.99                  |

**Table S4.** Clustering results for the top six clusters from GPATase-DON-cPRPP model MD simulations trajectories with K-means clustering algorithm.

| #Cluster | Frames | %    | AvgDist <sup>a</sup> | Stdev <sup>b</sup> | Centroid <sup>c</sup> | AvgCdist <sup>d</sup> |
|----------|--------|------|----------------------|--------------------|-----------------------|-----------------------|
| <b>0</b> | 5109   | 25.5 | 1.36                 | 0.19               | 11520                 | 1.35                  |
| <b>1</b> | 3248   | 16.2 | 1.49                 | 0.23               | 7182                  | 1.42                  |
| <b>2</b> | 2854   | 14.3 | 1.32                 | 0.16               | 17733                 | 1.63                  |
| <b>3</b> | 2579   | 12.9 | 1.37                 | 0.20               | 14761                 | 1.59                  |
| <b>4</b> | 1721   | 8.6  | 1.40                 | 0.20               | 16033                 | 1.61                  |
| <b>5</b> | 1372   | 6.9  | 1.35                 | 0.23               | 1031                  | 1.46                  |

<sup>a</sup> AvgDist is the the average distance (Å) between all frames in the cluster

<sup>b</sup> Stdev is the standard deviation (Å) between all frames in the cluster.

<sup>c</sup> Centroid is the frame number of the lowest cumulative distance to any other frames.

<sup>d</sup> AvgCdist is the average distance (Å) of the cluster to any other cluster.
